# Supplementary material
Source: Springer Nature journal article supplement (https://www.springermedizin.de/resource/supplementary/12913_2008_838_MOESM3_ESM.pdf/9535694)
Supplement: MOESM3 [file 9535694]

| Cluster                    | Components of value assessment (alphabetical by cluster)          | Weight | Synthesized available evidence                                            | Score | Evaluator's comments | Value contribution |
|----------------------------|-------------------------------------------------------------------|--------|---------------------------------------------------------------------------|-------|----------------------|--------------------|
| <b>Quality of evidence</b> |                                                                   |        |                                                                           |       |                      |                    |
| Q1                         | Adherence to requirements of decisionmaking body                  |        | Quality Matrix                                                            |       |                      |                    |
| Q2                         | Completeness and consistency of reporting evidence                |        |                                                                           |       |                      |                    |
| Q3                         | Relevance and validity of evidence                                |        |                                                                           |       |                      |                    |
| <b>Disease impact</b>      |                                                                   |        |                                                                           |       |                      |                    |
| D1                         | Disease severity                                                  |        |                                                                           |       |                      |                    |
| D2                         | Size of population affected by disease                            |        |                                                                           |       |                      |                    |
| <b>Intervention</b>        |                                                                   |        |                                                                           |       |                      |                    |
| I1                         | Current clinical guidelines                                       |        |                                                                           |       |                      |                    |
| I2                         | Current interventions' limitations                                |        |                                                                           |       |                      |                    |
| I3                         | Improvement of efficacy/effectiveness                             |        |                                                                           |       |                      |                    |
| I4                         | Improvement of safety & tolerability                              |        |                                                                           |       |                      |                    |
| I5                         | Improvement of patient reported outcomes, convenience & adherence |        |                                                                           |       |                      |                    |
| I6                         | Public health interest                                            |        |                                                                           |       |                      |                    |
| I7                         | Type of medical service                                           |        |                                                                           |       |                      |                    |
| <b>Economics</b>           |                                                                   |        |                                                                           |       |                      |                    |
| E1                         | Budget impact on health plan                                      |        |                                                                           |       |                      |                    |
| E2                         | Cost-effectiveness of intervention                                |        |                                                                           |       |                      |                    |
| E3                         | Impact on other spending                                          |        |                                                                           |       |                      |                    |
| <b>Total</b>               |                                                                   |        | <b>Value estimate (sum of all value contributions; MCDA linear model)</b> |       |                      |                    |
